# Supplementary material for: Label-free detection of proteins from dried-suspended droplets using surface enhanced Raman scattering
Source: Royal Society of Chemistry journal article supplement (doi:10.1039/c2an16296b), 2012-01-01
Supplement: c2an16296b.pdf [file c2an16296b.pdf]

# Label-Free Detection of Proteins from Dried-Suspended Droplets Using Surface Enhanced Raman Scattering

Sercan Keskin and Mustafa Culha\*

*Department of Genetics and Bioengineering, Faculty of Engineering, Yeditepe University, Atasehir, Istanbul 34755, Turkey.*

Table 1 shows the physicochemical properties of the proteins used in the study. The hydrodynamic radius and zeta potential of the proteins in the suspension were investigated by DLS (Zetasizer) at room temperature. The system contains a 4 mW He-Ne laser with a wavelength of 633 nm. The scattered light was collected by an avalanche photodiode detector with an angle of 173°. The refractive index and absorption of the protein solutions were assumed as 1.45 and 0.001, respectively.

**Table 1** Physicochemical properties of the proteins.

| Protein      | Isoelectric point (pI) | Molecular weight (kDa) | Zeta potential (mV) | Hydrodynamic radius (nm) | Property |
|--------------|------------------------|------------------------|---------------------|--------------------------|----------|
| HSA          | 4,7-5,2                | 66,5                   | -28,9               | 7,937                    | Acidic   |
| Transferrin  | ~5,5                   | 76                     | -18,4               | 15,55                    | Acidic   |
| Myoglobin    | 6,8-7,3                | 17,6                   | -17,6               | 4,259                    | Acidic   |
| Cyt <i>c</i> | 10-10,5                | 12,3                   | +22,5               | 2,01                     | Basic    |
| Avidin       | ~10                    | 66                     | +27,1               | 3,53                     | Basic    |
| Lysozyme     | 11,4                   | 14,3                   | +5,9                | 2,1                      | Basic    |

Figure 1 shows the photographs of suspending drying droplets on both  $\text{CaF}_2$  and PDMS surfaces. The hydrophobicity of the  $\text{CaF}_2$  and PDMS is very similar as concluded from the contact angle measurements, which were found  $90^\circ$  and  $95^\circ$  for  $\text{CaF}_2$  and PDMS, respectively.

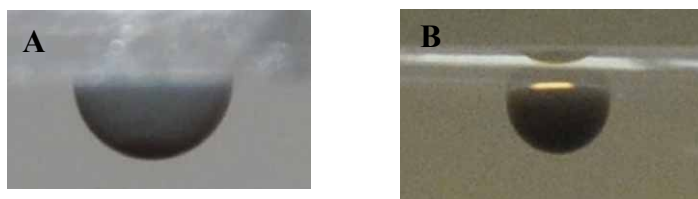

**Fig. 1** The photographs of hanging drying droplets on both  $\text{CaF}_2$  (A) and PDMS (B) surface.

Fig. 2 shows ten SERS spectra obtained from negatively, HSA, and positively charged protein, *cyt c*, containing suspended dried droplets and white light images of the droplet areas where these spectra were collected. The reproducibility of the SERS spectra was found satisfactory after testing the spot-to-spot spectral variations on the region where the SERS spectra obtained. The spectra presented on Fig. 2 are raw and no baseline correction was made.

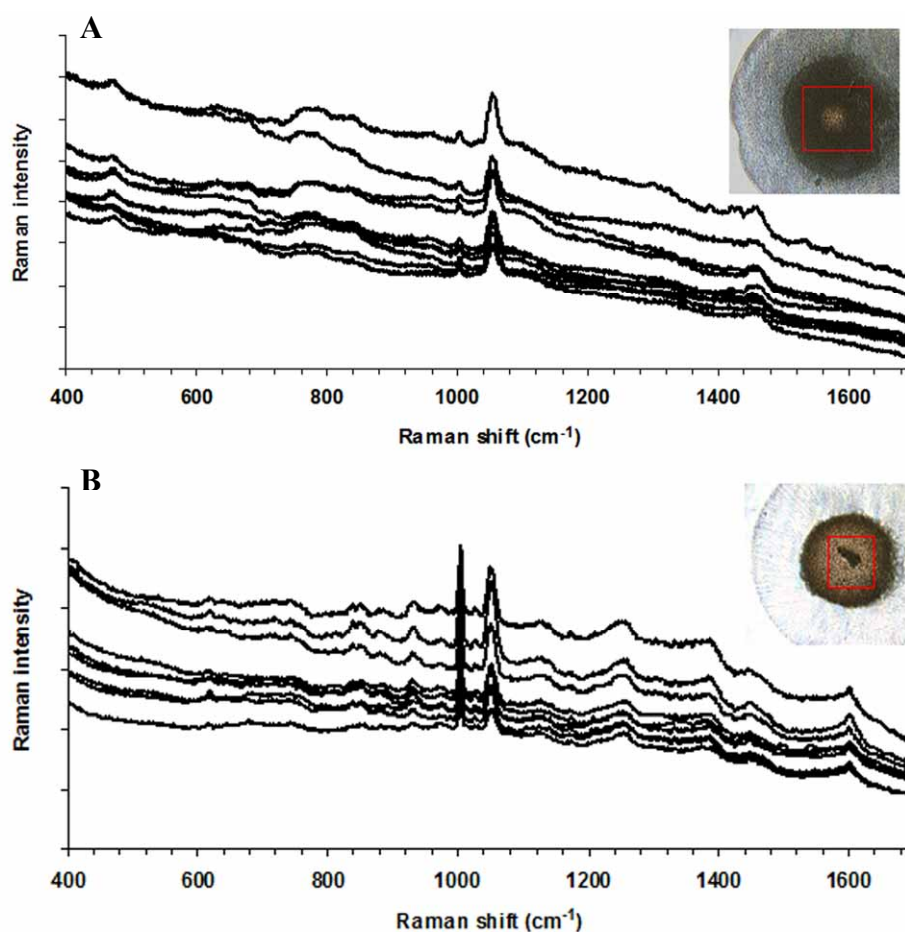

**Fig. 2** Ten SERS spectra obtained from HSA (A) and *cyt c* (B) containing suspended dried droplets and white light images of the droplet area where these spectra were collected. The protein concentration is 50  $\mu\text{g}/\text{mL}$  for both protein-AgNP mixtures.

Fig. 3 shows the five SERS spectra obtained from negatively, HSA, (A) and positively charged protein, cyt *c*, (B) containing suspended dried droplets. Each SERS spectrum on the graphs is the average of ten SERS spectra, which were randomly collected from the middle regions of five different droplets. The spectra presented on Fig. 3 are raw and no baseline correction was made.

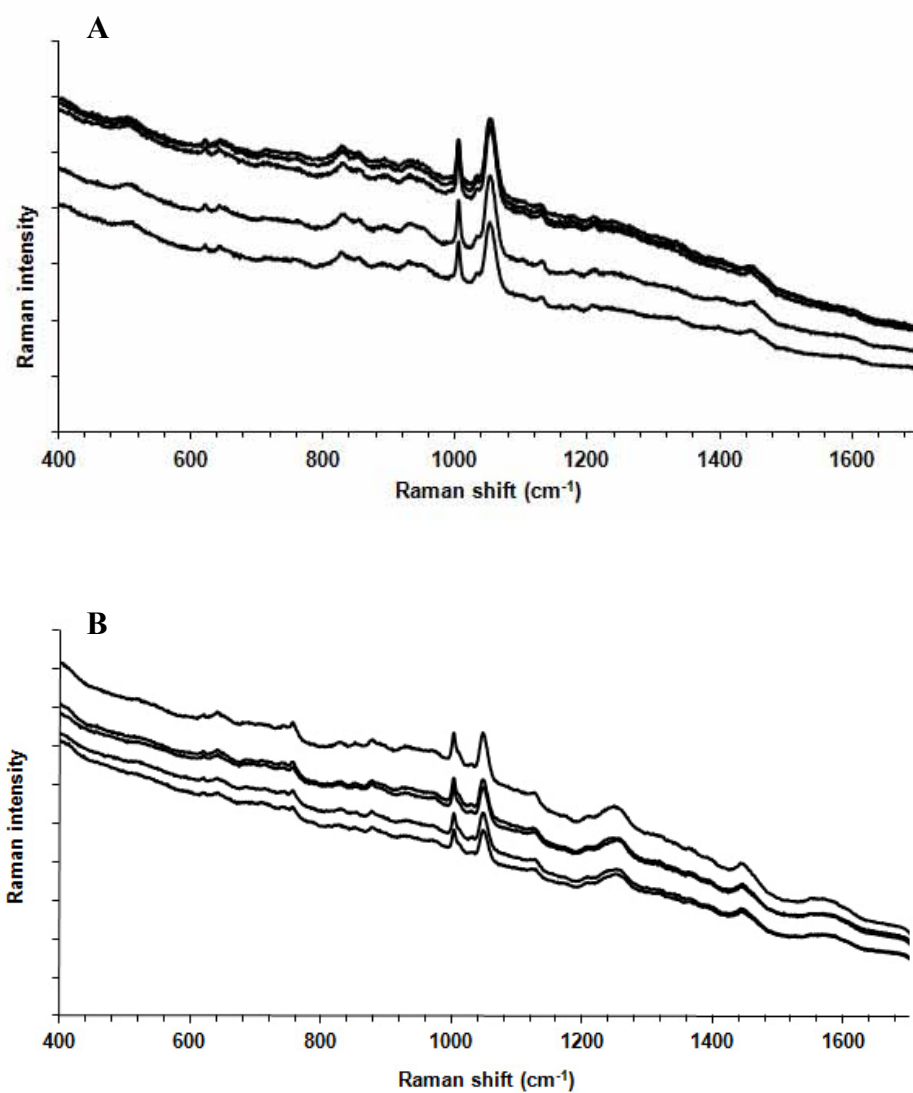

**Fig. 3** Five SERS spectra obtained from negatively, HSA (A) and positively charged protein, cyt *c*, (B) containing suspended dried droplets. Each SERS spectrum on the graphs is the average of ten SERS spectra, which were randomly collected from the middle regions of five different droplets. The protein concentration is 50  $\mu\text{g/mL}$  for both protein-AgNP mixtures.

**Table 2** Band assignments for SERS spectra of proteins.

| HSA  | Transferrin | Myoglobin | Cyt <i>c</i> | Avidin | Lysozyme | Band Assignments                         |
|------|-------------|-----------|--------------|--------|----------|------------------------------------------|
| 471  | ---         | ---       | ---          | ---    | ---      | ---                                      |
| ---  | ---         | ---       | 524          | ---    | ---      | S-S str. <sup>1</sup>                    |
| ---  | ---         | ---       | ---          | 540    | ---      | Cys <sup>2</sup>                         |
| ---  | 618         | 618       | ---          | 618    | ---      | C-C twist. <sup>3</sup>                  |
| ---  | 646         | ---       | 643          | ---    | ---      | Tyr <sup>4</sup>                         |
| 631  | 710         | 700       | 710          | ---    | 669      | Met <sup>5</sup>                         |
| 712  |             |           | 738          |        |          |                                          |
| 756  | 755         | ---       | ---          | 758    | 755      | Trp <sup>6</sup>                         |
| ---  | 827         | ---       | ---          | ---    | 827      | Pro, Tyr <sup>4</sup>                    |
| 838  | ---         | 838       | 838          | ---    | ---      | vibration of amine groups <sup>7</sup>   |
| 852  | 852         | 852       | ---          | 852    | 852      | Tyr, Pro <sup>4</sup>                    |
| ---  | ---         | ---       | 879          | ---    | ---      | Trp, Pro <sup>4</sup>                    |
| 928  | 928         | 928       | 928          | 928    | 928      | Pro, Val <sup>8</sup>                    |
| 950  | 950         | ---       | ---          | 950    | 950      | Pro, Val <sup>9</sup>                    |
| ---  | ---         | ---       | 970          | ---    | ---      | Ser <sup>6</sup>                         |
| ---  | ---         | ---       | ---          | 980    | ---      | Trp <sup>6</sup>                         |
| 1001 | 1001        | 1001      | 1001         | 1001   | 1001     | Phe <sup>6</sup>                         |
| 1029 | 1029        | 1028      |              |        |          |                                          |
| 1053 | 1053        | 1053      | 1053         | 1053   | 1053     | C-O, C-N str. <sup>3</sup>               |
| 1088 | ---         | ---       | ---          | 1090   | ---      | C-C str. <sup>10</sup>                   |
| ---  | 1123        | 1123      | 1083         | ---    | ---      | C-N str. <sup>1</sup>                    |
| ---  |             |           | 1123         |        |          |                                          |
| ---  | ---         | ---       | 1171         | 1171   | ---      | Try <sup>6</sup>                         |
| ---  | 1204        | ---       | ---          | ---    | ---      | Try+Phe <sup>6</sup>                     |
| ---  | ---         | ---       | ---          | ---    | 1224     | Amide III <sup>11</sup>                  |
| ---  | ---         | ---       | 1250         | ---    | ---      | Amide III <sup>6</sup>                   |
| ---  | ---         | ---       | ---          | 1237   | ---      | Gly, Pro <sup>12</sup>                   |
| ---  | ---         | ---       | ---          | 1280   |          |                                          |
| ---  | ---         | 1335      | ---          | ---    | ---      | Trp <sup>6</sup>                         |
| ---  | ---         | 1368      | 1368         | ---    | 1355     | Trp <sup>6</sup>                         |
| ---  | 1441        | ---       | ---          | ---    | ---      | CH <sub>2</sub> sciss. <sup>6</sup>      |
| 1453 | ---         | ---       | ---          | ---    | ---      | Gly <sup>6</sup>                         |
| ---  | ---         | ---       | 1444         | ---    | 1444     | CH <sub>2</sub> sciss. <sup>6</sup>      |
| ---  | ---         | ---       | 1582         | ---    | ---      | Phe <sup>6</sup>                         |
| ---  | ---         | 1600      | ---          | 1602   | ---      | COO <sup>-</sup> asym. str. <sup>6</sup> |

## References

---

- 1- N. Stone, C. Kendall, N. Shepherd, P. Crow and H. Barr, *J. Raman Spectrosc.*, 2002, **33**, 564–573.
- 2- Shetty, G., Kedall, C., Shepherd, N., Stone, N., and Barr, H. *Br. J. Cancer*. 2006, **94**, 1460–1464.
- 3- J. W. Chan, D. S. Taylor, T. Zwerdling, S. T. Lane, K. Ihara and T. Huser, *Biophys. J.*, 2006, **90**, 648–656.
- 4- W.-T. Cheng, M.-T. Liu, H.-N. Liu and S.-Y. Lin, *Microsc. Res. Tech.*, 2005, **68**, 75–79.
- 5- G. Shetty, C. Kedall, N. Shepherd, N. Stone and H. Barr, *Br. J. Cancer*, 2006, **94**, 1460–1464.
- 6- S. Stewart, P.M. Frederics, *Spectrochimica Acta Part A*, 1999, **55**, 1615-1640.
- 7- D. Naumann, *Proc. SPIE*. 1998, **3257**, 245–257.
- 8- D.P. Lau, Z. Huang, H. Lui, C.S. Man, K. Berean, M. D. Morrison and H. Zeng, *Lasers in Surgery and Medicine*, 2003, **32**, 210–214.
- 9- M. Gniadecka, H.C. Wulf, N.N. Mortensen, O.F. Nielsen and D.H. Christensen, *J. Raman Spectrosc.*, 1997, **28**, 125–129.
- 10- N. Stone, C. Kendall, J. Smith, P. Crow and H. Barr, *Faraday Discuss.*, 2004, **126**, 141–157.
- 11- R.J. Lakshimi, V.B. Kartha, C.M. Krishna, J.G.R. Solomon, G. Ullas and P. Uma Devi, *Radiat. Res*, 2002, **157**, 175–182.
